# Supplementary material for: Development and Characterization of Magnetic SARS-CoV-2 Peptide-Imprinted Polymers
Source: MDPI journal article supplement (doi:10.3390/nano11112985), 2021-11-06
Supplement: s1 [file s1]

## **Development and characterization of magnetic SARS-CoV-2 peptide-imprinted polymers**

Beatriz Fresco-Cala <sup>1,\*</sup>, Soumya Rajpal <sup>1,2</sup>, Tamara Rudolf <sup>1</sup>, Benedikt Keitel <sup>1</sup>, Rüdiger Groß <sup>3</sup>, Jan Münch <sup>3</sup>, Alex D. Batista <sup>1,\*</sup> and Boris Mizaikoff <sup>1,4</sup>.

<sup>1</sup>Institute of Analytical and Bioanalytical Chemistry, Ulm University, 89081 Ulm, Germany; beatriz.fresco-cala@uni-ulm.de (B.F.-C.); rajpalsoumya@yahoo.com (S.R.); tamara.rudolf@uni-ulm.de (T.R.); benedikt.keitel@uni-ulm.de (B.K.); alexbatista@ufu.br (A.D.B.); boris.mizaikoff@uni-ulm.de (B.M.)

<sup>2</sup>Department of Biochemical Engineering and Biotechnology, Indian Institute of Technology Delhi, 110016, New Delhi, India; rajpalsoumya@yahoo.com (S.R.)

<sup>3</sup>Institute of Molecular Virology, Ulm University Medical Center, 89081 Ulm, Germany; boris.mizaikoff@uni-ulm.de (B.M.)

<sup>4</sup>Hahn-Schickard, 89077 Ulm, Germany; ruediger.gross@uni-ulm.de (R.G.); jan.muench@uni-ulm.de (J.M.)

\*Correspondence: beatriz.fresco-cala@uni-ulm.de (B.F.-C.); alexbatista@ufu.br (A.D.B.)

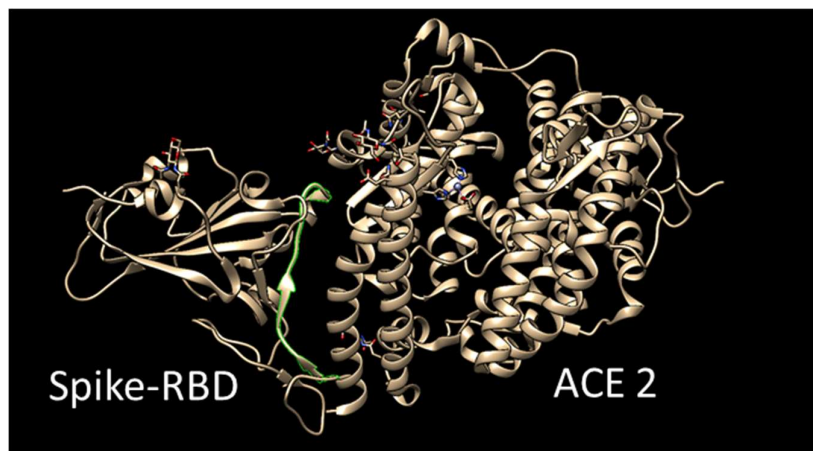

**Figure S1.** Protein complex representing interactions between receptor binding domain (RBD) of the spike protein specific to the SARS-CoV-2 with the ACE 2 receptor (PDB ID: 6M0J). The highlighted sequence (green) was chosen as the target template/epitope for imprinting.

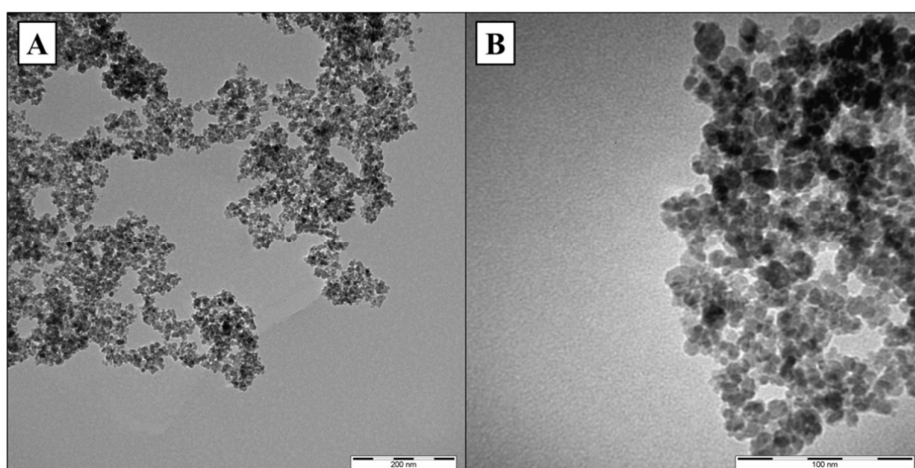

**Figure S2.** TEM micrographs of the prepared MNPs.

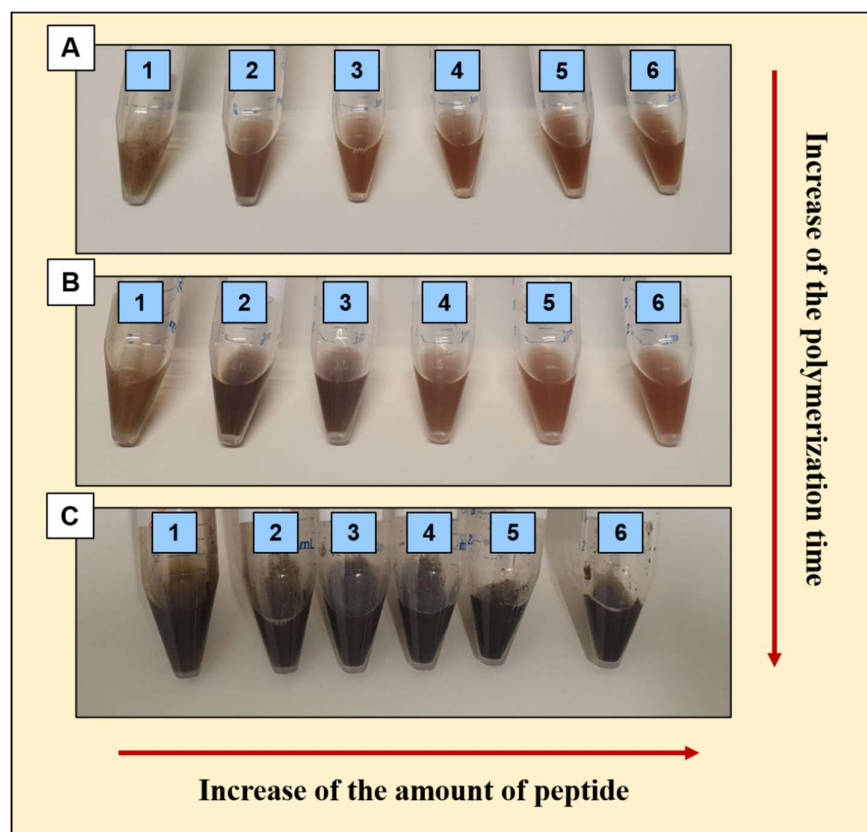

**Figure S3.** Photographs of the MNIPs/MMIPs with different amounts of peptides and prepared with different polymerization times. **A)** N°1 is MNIP-1, N°2 is MMIP-05-1, N°3 is MMIP-1-1, N°4 is MMIP-2-1, N°5 is MMIP-3-1 and N°6 is MMIP-4-1. **B)** N°1 is MNIP-2, N°2 is MMIP-05-2, N°3 is MMIP-1-2, N°4 is MMIP-2-2, N°5 is MMIP-3-2 and N°6 is MMIP-4-2. **C)** N°1 is MNIP-24, N°2 is MMIP-05-24, N°3 is MMIP-1-24, N°4 is MMIP-2-24, N°5 is MMIP-3-24 and N°6 is MMIP-4-24.

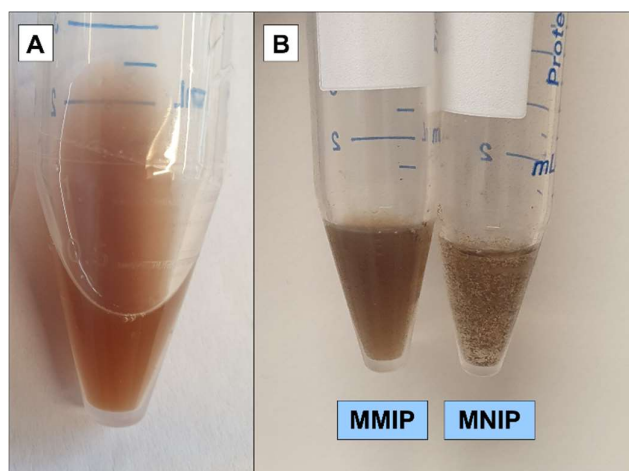

**Figure S4.** Photographs of the dispersion of **A)** MNPs and **B)** MMIP/MNIP.

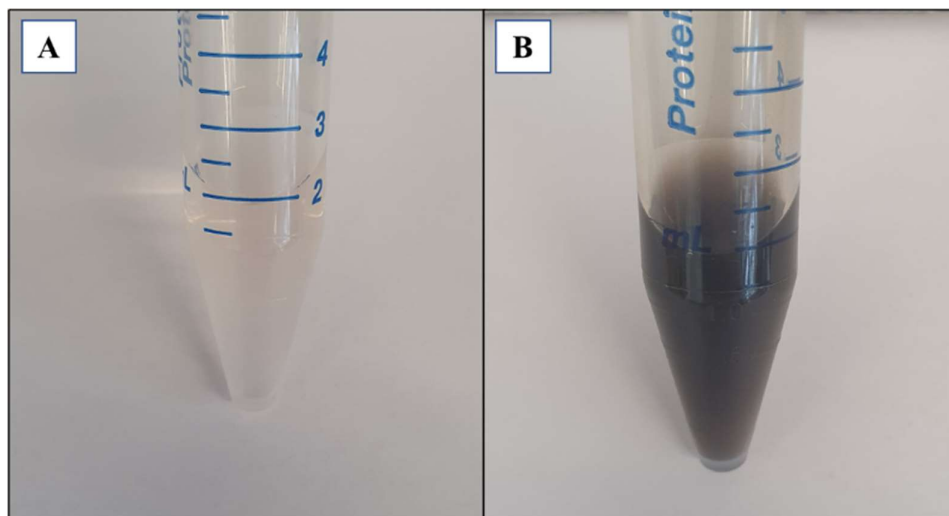

**Figure S5.** Photographs of **A)** dopamine and **B)** polydopamine solutions.

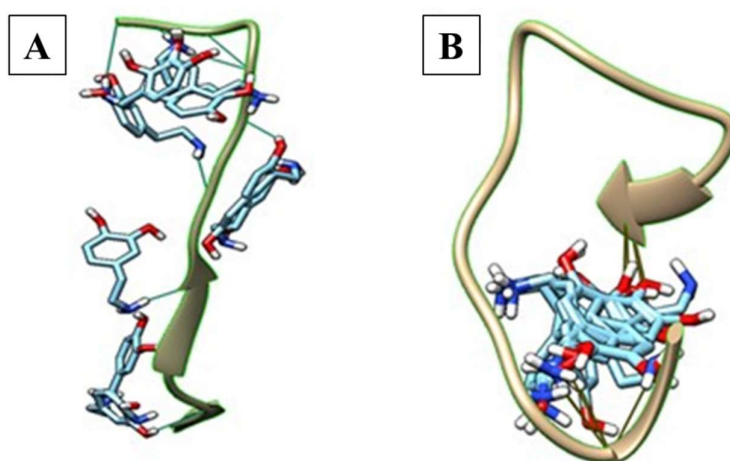

**Figure S6.** Representation of nine docked poses of dopamine in the binding energy range of **A)** - 3.2 to -3.4 kcal/mol with SARS-CoV-2 peptide and **B)** -3.6 to -4.0 kcal/mol with Zika virus peptide.
